# Supplementary material for: Covalently cross-linked polymer stabilized electrolytes with self-healing performance via boronic ester bonds
Source: Royal Society of Chemistry journal article supplement (doi:10.1039/d0py00728e), 2020-01-01
Supplement: d0py00728e1.pdf [file d0py00728e1.pdf]

## Supporting Information

### Covalently cross-linked polymer stabilized electrolytes with self-healing performance via boronic ester bonds

Sibo Li,<sup>1,#</sup> Cai Zuo,<sup>1,#</sup> Yong Zhang,<sup>1</sup> Jirong Wang,<sup>1</sup> Huihui Gan,<sup>1</sup> Shaoqiao Li,<sup>1</sup> Liping Yu,<sup>1</sup>  
Binghua Zhou<sup>\*,2</sup>, Zhigang Xue<sup>\*,1,3</sup>

<sup>1</sup>Key Laboratory for Material Chemistry of Energy Conversion and Storage, Ministry of Education, School of Chemistry and Chemical Engineering, Huazhong University of Science and Technology, Wuhan 430074, China. <sup>2</sup>Institute of Advanced Materials (IAM), Jiangxi Normal University, Nanchang 330022, China. <sup>3</sup>State Key Laboratory of Materials Processing and Die & Mold Technology, Huazhong University of Science and Technology, Wuhan 430074, China.

E-mail addresses: zhoubh@jxnu.edu.cn (B. Zhou); zgxue@mail.hust.edu.cn (Z. Xue)

<sup>#</sup>These authors contributed equally to this work.

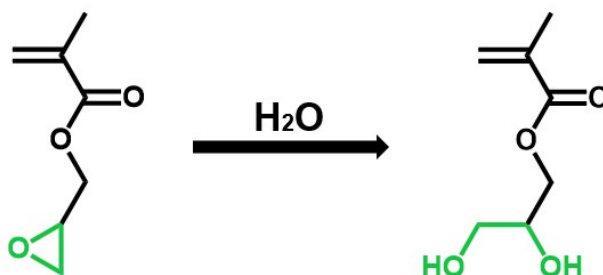

**Fig. S1.** Schematic illustration of the preparation procedure of DHPMA.

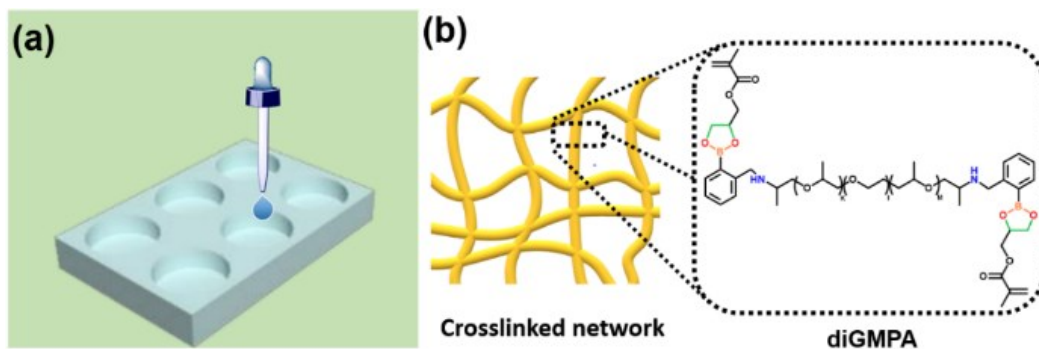

**Fig. S2.** (a) Fabrication route of SPEs via the solution casting procedure; (b) Schematic illustration of the diGMPA-based SPEs with the cross-linked network.

| Entry | diGMPA (g) | BA (g) | LiClO <sub>4</sub> (wt%) | BP (wt%) | $\sigma$ (S cm <sup>-1</sup> ) <sub>60°C</sub> | 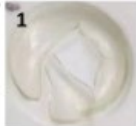   |    |
|-------|------------|--------|--------------------------|----------|------------------------------------------------|--------------------------------------------------------------------------------------|---------------------------------------------------------------------------------------|
| 1     | 0.5        | 0.1    | 11                       | 0.5      | ×                                              |                                                                                      |                                                                                       |
| 2     | 0.5        | 0.2    | 11                       | 0.5      | ×                                              |                                                                                      |   |
| 3     | 0.5        | 0.3    | 11                       | 0.5      | ×                                              |                                                                                      |                                                                                       |
| 4     | 0.5        | 0.4    | 11                       | 0.5      | 5.7E-6                                         |  |                                                                                       |
| 5     | 0.5        | 0.5    | 11                       | 0.5      | 9.8E-6                                         |                                                                                      |  |

**Fig. S3.** Ionic conductivity of P(*n*-BA)-diGMPA system at 60°C (left); Optical images of P(*n*-BA)-diGMPA system (right).

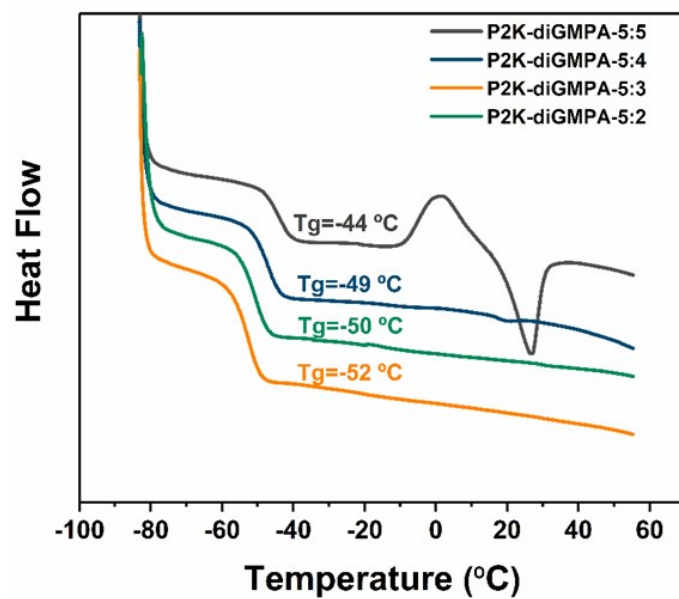

Fig. S4 DSC curves of solid polymer electrolytes with different content of PEGDA.

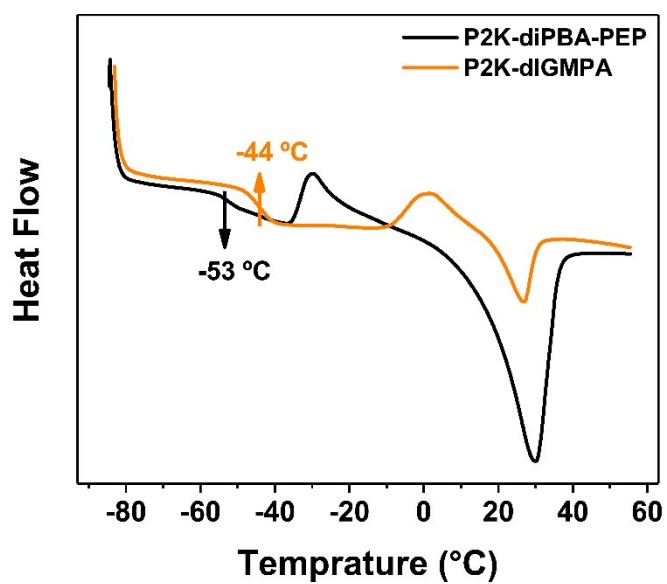

Fig. S5 DSC curves of P2K-diPBA-PEP and P2K-diGMA.
